# Supplementary material
Source: publisher site journal article supplement (https://www.spandidos-publications.com/665/downloadSupplementary)

Figure S1. Effect of dioscin on ROS production by DCs. ROS production in HG + Dioscin + HG group was similar to that of cells only treated with 30 mM HG in HG group. \*\*P<0.01 vs. control group; ##P<0.01 vs. HG group. ROS, reactive oxygen species; HG, high glucose.

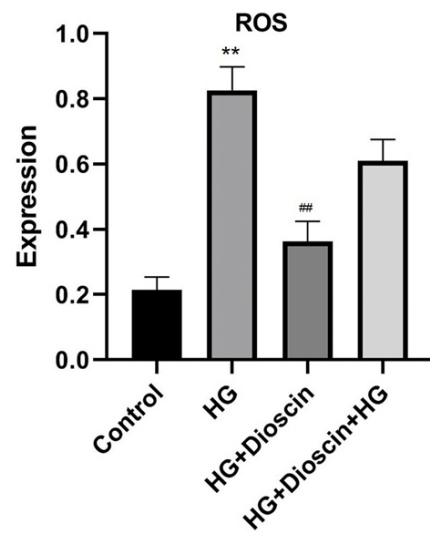

Figure S2. Expression levels of the scavenger receptors. (A) CD36, (B) LOX-1 and (C) SR-A in HG + Dioscin + HG group were similar to those of cells only treated with 30 mM HG in HG group. \*\* $P < 0.01$  vs. control group; # $P < 0.05$ , ## $P < 0.01$  vs. HG group. HG, high glucose; LOX-1, lectin-like oxidized low-density lipoprotein receptor-1; SR-A, class A scavenger receptors.

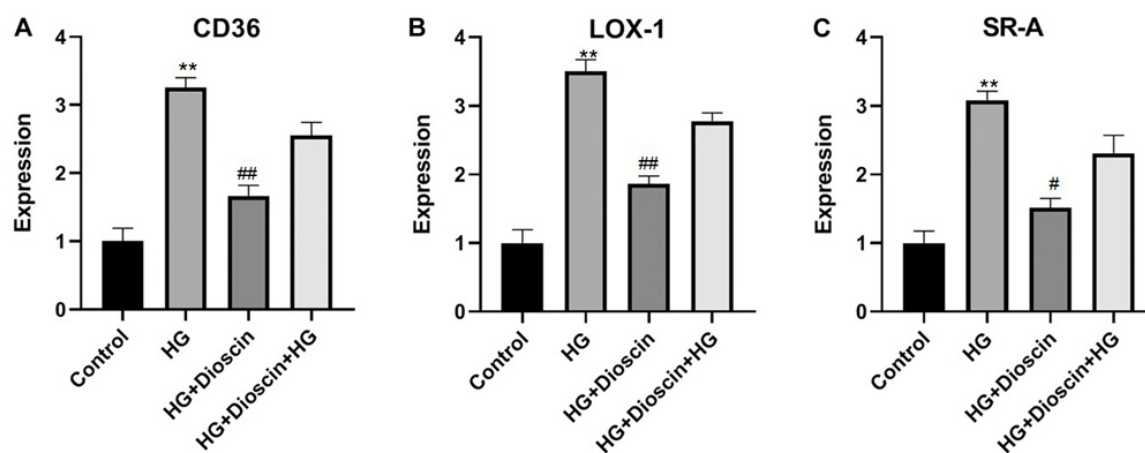

Supplement: Supplementary file 1 [file downloadSupplementary]
